# Supplementary material for: Environmental control of rice flowering time
Source: PubMed Central journal article supplement — Plant Commun. 2023 May 4;4(5):100610. doi: 10.1016/j.xplc.2023.100610 (PMC10504588; doi:10.1016/j.xplc.2023.100610), 2023-05-04
Supplement: mmc1.pdf [file mmc1.pdf]

**Plant Communications, Volume 4**

**Supplemental information**

**Environmental control of rice flowering time**

**Giulio Vicentini, Marco Biancucci, Lorenzo Mineri, Daniele Chirivì, Francesca Giaume, Yiling Miao, Junko Kyo-zuka, Vittoria Brambilla, Camilla Betti, and Fabio Fornara**

**Supplementary Table 1. List of rice flowering time genes.** The list includes a brief description of the function of genes not discussed in the main text. References used to elaborate the description are also indicated. Genes are listed in alphabetical order.

| Name                                                             | Description                                                                                                                                                                                                                                                                                                                                                                                                                                                                                                                                                                                                                                                                                                                                   | Source                                                                                                                                           |
|------------------------------------------------------------------|-----------------------------------------------------------------------------------------------------------------------------------------------------------------------------------------------------------------------------------------------------------------------------------------------------------------------------------------------------------------------------------------------------------------------------------------------------------------------------------------------------------------------------------------------------------------------------------------------------------------------------------------------------------------------------------------------------------------------------------------------|--------------------------------------------------------------------------------------------------------------------------------------------------|
| <b>Ehd2/RID1/OsID1 - Os10g0419200 SID1/OsIDD4 - Os02g0672100</b> | Ehd2 is an IDD domain containing transcription factor. <i>SID1</i> encodes for a zinc finger transcription factor. <i>Ehd2</i> promotes flowering through <i>Ehd1</i> both in LD and SD. Knockout mutants of <i>Ehd2</i> never flower, but if <i>SID1</i> is overexpressed, then flowering is recovered. However, overexpression of <i>Ehd1</i> in the <i>ehd2</i> mutant background does not restore the never-flowering phenotype. In a WT background <i>SID1</i> overexpressors show no phenotypes. Both Ehd2 and SID1 can bind to the same location in florigens promoters.                                                                                                                                                               | (Matsubara et al., 2008; Park et al., 2008; Cai et al., 2014; Deng et al., 2017)                                                                 |
| <b>Ehd3 - Os08g0105000</b>                                       | PHD finger motifs containing protein expressed in developing leaves and in the shoot apex. It promotes flowering both in SD and LD. In SD, it promotes <i>Ehd1</i> expression while in LD it is a key repressor of <i>Ghd7</i> . Knockout of <i>Ehd3</i> prevents flowering in LD due to constitutive high levels of <i>Ghd7</i> .                                                                                                                                                                                                                                                                                                                                                                                                            | (Matsubara et al., 2011)                                                                                                                         |
| <b>Ehd4 - Os03g0112700</b>                                       | CCCH-type zinc finger protein. Its knockout mutant is late flowering both in LD and SD, with null expression of <i>Ehd1</i> and the florigens. The effect of Ehd4 on <i>Ehd1</i> transcription is indirect.                                                                                                                                                                                                                                                                                                                                                                                                                                                                                                                                   | (Gao et al., 2013)                                                                                                                               |
| <b>EL1/CK1 - Os03g0793500</b>                                    | The <i>el1</i> loss of function mutant is early flowering only in LD. It represses <i>Ehd1</i> possibly by activating Ghd7 protein and maybe other flowering repressors via phosphorylation.                                                                                                                                                                                                                                                                                                                                                                                                                                                                                                                                                  | (Hori et al., 2013)                                                                                                                              |
| <b>HGW - Os06g0160400</b>                                        | UBA domain protein involved in ubiquitination. It promotes flowering under field conditions by promoting <i>OsGI</i> , <i>Hd1</i> and <i>Hd3a</i> expression.                                                                                                                                                                                                                                                                                                                                                                                                                                                                                                                                                                                 | (Li et al., 2012)                                                                                                                                |
| <b>OsCONSTANS-like genes</b>                                     | Many CONSTANS-like genes have been characterized having effects on flowering time and including <i>OsCO3</i> , <i>OsCOL10</i> , <i>OsCOL13</i> , <i>OsCOL15</i> and <i>OsCOL16</i> . All have been shown to delay flowering when overexpressed both in LD and SD by repressing <i>Ehd1</i> . Frequently, knockout mutants don't have phenotypes, possibly because of redundancy among them. The <i>oscol4</i> knockout shows early flowering in both LD and SD and increased levels of <i>Ehd1</i> transcription. Expression of <i>OsCOL4</i> is high during vegetative growth but it progressively reduces over time, permitting <i>Ehd1</i> mRNA levels to rise. <i>OsCOL4</i> overexpression leads to late flowering in both photoperiods. | (Kim et al., 2008; Lee et al., 2016; Lee et al., 2010; Tan et al., 2016; Sheng et al., 2016; Tan et al., 2017; Wu et al., 2017; Wu et al., 2018) |
| <b>OsDOF12 - Os03g0169600</b>                                    | <i>OsDOF12</i> encodes for a zinc finger transcriptional activator. Its overexpression leads to higher <i>Hd3a</i> levels in LD, causing early flowering.                                                                                                                                                                                                                                                                                                                                                                                                                                                                                                                                                                                     | (Li et al., 2009)                                                                                                                                |
| <b>OsELF3 - Os01g0566100</b>                                     | Knockout mutants are late flowering under LD. Its overexpressor are early flowering in LD but late flowering in SD. It acts by inhibiting <i>OsGI</i> , that in turn results in higher amounts of <i>Hd1</i> in the <i>oself3</i> mutant. OsELF3 can also inhibit the red light-induced expression of Ghd7.                                                                                                                                                                                                                                                                                                                                                                                                                                   | (Saito et al., 2012; Zhao et al., 2012; Yang et al., 2013a)                                                                                      |
| <b>OsEMF2b - Os09g0306800</b>                                    | <i>OsEMF2b</i> encodes for a zinc finger protein homolog of Arabidopsis EMF2, which is part of a polycomb complex acting to silence gene expression by histone methylation. The <i>OsEMF2b</i> loss of function mutant is late flowering both in LD                                                                                                                                                                                                                                                                                                                                                                                                                                                                                           | (Xie et al., 2015)                                                                                                                               |

|                                                                              |                                                                                                                                                                                                                                                                                                                                                                                                                                                                                                       |                                                                 |
|------------------------------------------------------------------------------|-------------------------------------------------------------------------------------------------------------------------------------------------------------------------------------------------------------------------------------------------------------------------------------------------------------------------------------------------------------------------------------------------------------------------------------------------------------------------------------------------------|-----------------------------------------------------------------|
|                                                                              | and SD. OsEMF2b is responsible for methylating OsLFL1, leading to its silencing and thus promoting flowering.                                                                                                                                                                                                                                                                                                                                                                                         |                                                                 |
| <b>OsFKF1 -<br/>Os11g0547000</b>                                             | Homolog of FKF1 and encoding for a blue light photoreceptor with F-box domain typical of E3 ubiquitin ligase. The knockout is late flowering both in LD and SD. OsFKF1 promotes flowering by inducing <i>Ehd2</i> expression, that results in <i>Ghd7</i> inhibition and finally an activation of the <i>Ehd1</i> pathway.                                                                                                                                                                            | (Han et al., 2015)                                              |
| <b>OsLFL1 -<br/>Os01g0713600</b>                                             | The overexpressor is late flowering because OsLFL1 can bind to the <i>Ehd1</i> promoter to prevent its expression. It can also bind to the <i>OsMFT1</i> promoter to activate its expression.                                                                                                                                                                                                                                                                                                         | (Peng et al., 2007;<br>Peng et al., 2008;<br>Song et al., 2018) |
| <b>OsMADS50 –<br/>Os03g0122600</b><br><br><b>OsMADS56 –<br/>Os10g0536100</b> | Knockout mutants of <i>OsMADS50</i> are late flowering only in LD while knockout mutants of <i>OsMADS56</i> have no phenotype; however, <i>OsMADS56</i> overexpressors are late flowering only in LD. So <i>OsMADS50</i> and <i>OsMADS56</i> are specific LD flowering promoter and repressor respectively. Both <i>osmads50</i> mutant and <i>OsMADS56</i> overexpressor show upregulation of <i>LFL1</i> , explaining their phenotype. They can form homodimers or heterodimers between each other. | (Ryu et al., 2009)                                              |
| <b>OsMADS51 -<br/>Os01g0922800</b>                                           | Acts as a flowering promoter in SD by activating the <i>Ehd1</i> pathway. <i>OsMADS51</i> expression is promoted by <i>OsGI</i> .                                                                                                                                                                                                                                                                                                                                                                     | (Kim et al., 2007)                                              |
| <b>OsMFT1 -<br/>Os06g0498800</b>                                             | Belongs to the family of phosphatidylethanolamine-binding proteins. In LD the overexpressor is late flowering while the knockout mutant is slightly early. Its expression is positively affected by <i>Ghd7</i> , and <i>OsMFT1</i> acts by reducing <i>Ehd1</i> expression.                                                                                                                                                                                                                          | (Song et al., 2018)                                             |
| <b>OsNF-YB9 -<br/>Os06g0285200</b><br><b>OsNF-YC12 -<br/>Os05g0304800</b>    | OsNF-YB9 and OsNF-YC12 are subunit of a heterotrimeric transcription factor. These 2 subunits interact together and each one is also able to bind <i>OsGI</i> . Their overexpressors are late flowering.                                                                                                                                                                                                                                                                                              | (Das et al., 2019)                                              |
| <b>OsVIL2 -<br/>Os02g0152500</b>                                             | The knockout mutant is late flowering in both LD and SD. <i>OsVIL2</i> seems to positively regulate <i>Ehd1</i> expression by reducing transcription of the flowering inhibitor <i>OsLFL1</i> .                                                                                                                                                                                                                                                                                                       | (Yang et al., 2013b)                                            |
| <b>OsVIL3 -<br/>Os05g0145400</b>                                             | The <i>osvil3</i> mutant is late flowering only in SD. <i>OsVIL3</i> can bind to the promoter of <i>OsLF</i> (a minor flowering repressor) to reduce its expression.                                                                                                                                                                                                                                                                                                                                  | (Wang et al., 2013)                                             |
| <b>RCN1 -<br/>Os03g0281900</b><br><b>RCN2 -<br/>Os02g0531600</b>             | Transcription factors homologs of TFL1/CEN. <i>RCN1</i> is expressed in developing panicles; <i>RCN2</i> both in vegetative and reproductive meristems. Overexpressors show delayed heading and altered panicle morphology, sometimes plants are incapable of concluding panicle development.                                                                                                                                                                                                         | (Nakagawa et al., 2002)                                         |
| <b>RFL -<br/>Os04g0598300</b>                                                | Transcription factor homolog to LFY. It promotes flowering by increasing <i>OsMADS50</i> expression. It is also fundamental for a correct panicle architecture.                                                                                                                                                                                                                                                                                                                                       | (Rao et al., 2008)                                              |
| <b>SDG724 –<br/>Os09g0307800</b>                                             | <i>SDG724</i> encodes for a histone methyltransferase which promotes flowering in LD. The loss-of-function mutant flowers late in LD and with only a slight flowering delay in SD. <i>SDG724</i> promotes H3K36me2/3 methylation of <i>OsMADS50</i> and <i>RFT1</i> , and enhances the expression of both florigens.                                                                                                                                                                                  | (Sun et al., 2012)                                              |
| <b>SDG725 -<br/>Os02g0554000</b><br><b>MRG702 –<br/>Os11g0545600</b>         | <i>SDG725</i> encodes for a histone methyltransferase. Knockdown plants show brassinosteroid-deficiency phenotypes, and are late flowering both in LD and SD due to altered methylation in many flowering related genes which leads to increased                                                                                                                                                                                                                                                      | (Sui et al., 2012; Sui et al., 2013; Jin et al., 2015)          |

|                                                                        |                                                                                                                                                                                                                                                                                                                                                                                                                                                                       |                                            |
|------------------------------------------------------------------------|-----------------------------------------------------------------------------------------------------------------------------------------------------------------------------------------------------------------------------------------------------------------------------------------------------------------------------------------------------------------------------------------------------------------------------------------------------------------------|--------------------------------------------|
|                                                                        | expression of the florigens. MRG702 encodes for a reader protein of H3K4me3 and H3K36me3. Knock-down plants show brassinosteroids-deficiency phenotypes and late flowering phenotypes, just as <i>SDG725</i> knock-downs. Indeed, MRG702 is able to bind DNA methylated by SDG725 and promote expression of flowering promoters, even though the precise mechanism is still unclear.                                                                                  |                                            |
| <b>Se14 -<br/>Os03g0151300</b>                                         | It encodes an H3K4 demethylase. It represses flowering in LD by inhibiting <i>Ehd1</i> and <i>RFT1</i> expression. The effect on <i>RFT1</i> is due to the demethylation activity on the <i>RFT1</i> promoter and gene, while the effect on <i>Ehd1</i> is indirect.                                                                                                                                                                                                  | (Yokoo et al., 2014)                       |
| <b>miR172<br/>SNB -<br/>Os07g0235800<br/>OsIDS1 -<br/>Os03g0818800</b> | <i>miR172</i> is a flowering promoter inhibited by PHYB. It targets the two AP2-like genes <i>SNB</i> and <i>OsIDS1</i> . These genes are flowering repressors positively regulated by <i>Hd1</i> and <i>OsCOL4</i> . Overexpressors of <i>SNB</i> and <i>OsIDS1</i> have decreased <i>Ehd1</i> expression both in LD and SD. Expression of <i>miR172</i> increase with the age of the plant, facilitating the repression of <i>SNB</i> and <i>OsIDS1</i> with aging. | (Lee et al., 2014)                         |
| <b>SPIN1 -<br/>Os03g0815700<br/>SPL11 -<br/>Os12g0570000</b>           | SPIN1 is an E3-ubiquitin ligase involved in the degradation of the flowering inhibitor SPL11, which suppress <i>Hd3a</i> expression.                                                                                                                                                                                                                                                                                                                                  | (Vega-Sánchez et al., 2008)                |
| <b>OsTrx1 -<br/>Os09g0134500<br/>SIP1 -<br/>Os09g0560900</b>           | OsTrx1 is a histone methyltransferase expressed mainly in leaf blades. It promotes flowering in LD by promoting <i>Ehd1</i> expression.<br>SIP1 is a C2H2 zinc finger transcription factor which can bind to OsTrx1 and to the <i>Ehd1</i> promoter, effectively directing the action of OsTrx1 to the <i>Ehd1</i> locus.                                                                                                                                             | (Choi et al., 2014;<br>Jiang et al., 2018) |

## References

- Cai, Y., Chen, X., Xie, K., Xing, Q., Wu, Y., Li, J., Du, C., Sun, Z., and Guo, Z. (2014). Dlf1, a WRKY Transcription Factor, Is Involved in the Control of Flowering Time and Plant Height in Rice. *PLoS One* 9:e102529.
- Choi, S. C., Lee, S., Kim, S. R., Lee, Y. S., Liu, C., Cao, X., and An, G. (2014). Trithorax group protein *Oryza sativa* trithorax1 controls flowering time in rice via interaction with early heading date3. *Plant Physiol.* 164:1326–1337.
- Das, S., Parida, S. K., Agarwal, P., and Tyagi, A. K. (2019). Transcription factor OsNF-YB9 regulates reproductive growth and development in rice. *Planta* 250:1849–1865.
- Deng, L., Li, L., Zhang, S., Shen, J., Li, S., Hu, S., Peng, Q., Xiao, J., and Wu, C. (2017). Suppressor of rid1 (SID1) shares common targets with RID1 on florigen genes to initiate floral transition in rice. *PLOS Genet.* 13:e1006642.
- Gao, H., Zheng, X.-M., Fei, G., Chen, J., Jin, M., Ren, Y., Wu, W., Zhou, K., Sheng, P., Zhou, F., et al. (2013). Ehd4 Encodes a Novel and *Oryza*-Genus-Specific Regulator of Photoperiodic Flowering in Rice. *PLOS Genet.* 9:e1003281.
- Han, S.-H., Yoo, S.-C., Lee, B.-D., An, G., and Paek, N.-C. (2015). Rice FLAVIN-BINDING, KELCH REPEAT, F-BOX 1 (OsFKF1) promotes flowering independent of photoperiod. *Plant. Cell Environ.* 38:2527–2540.

- Hori, K., Ogiso-Tanaka, E., Matsubara, K., Yamanouchi, U., Ebana, K., and Yano, M. (2013). Hd16, a gene for casein kinase I, is involved in the control of rice flowering time by modulating the day-length response. *Plant J.* **76**:36–46.
- Jiang, P., Wang, S., Zheng, H., Li, H., Zhang, F., Su, Y., Xu, Z., Lin, H., Qian, Q., and Ding, Y. (2018). SIP1 participates in regulation of flowering time in rice by recruiting OsTrx1 to Ehd1. *New Phytol.* **219**:422–435.
- Jin, J., Shi, J., Liu, B., Liu, Y., Huang, Y., Yu, Y., and Dong, A. (2015). MORF-RELATED GENE702, a reader protein of trimethylated histone H3 lysine 4 and histone H3 lysine 36, is involved in brassinosteroid-regulated growth and flowering time control in rice. *Plant Physiol.* **168**:1275–1285.
- Kim, S. L., Lee, S., Kim, H. J., Nam, H. G., and An, G. (2007). OsMADS51 Is a Short-Day Flowering Promoter That Functions Upstream of Ehd1, OsMADS14, and Hd3a. *Plant Physiol.* **145**:1484–1494.
- Kim, S.-K., Yun, C.-H., Lee, J. H., Jang, Y. H., Park, H.-Y., and Kim, J.-K. (2008). OsCO3, a CONSTANS-LIKE gene, controls flowering by negatively regulating the expression of FT-like genes under SD conditions in rice. *Planta* **228**:355–365.
- Lee, Y.-S., Lee, D.-Y., Cho, L.-H., and An, G. (2014). Rice miR172 induces flowering by suppressing OsIDS1 and SNB, two AP2 genes that negatively regulate expression of Ehd1 and florigens. *Rice* **7**:1–13.
- Li, D., Yang, C., Li, X., Gan, Q., Zhao, X., and Zhu, L. (2009). Functional characterization of rice OsDof12. *Planta* **229**:1159–69.
- Li, J., Chu, H., Zhang, Y., Mou, T., Wu, C., Zhang, Q., and Xu, J. (2012). The Rice HGW Gene Encodes a Ubiquitin-Associated (UBA) Domain Protein That Regulates Heading Date and Grain Weight. *PLoS One* **7**:e34231.
- Matsubara, K., Yamanouchi, U., Wang, Z.-X., Minobe, Y., Izawa, T., and Yano, M. (2008). Ehd2, a Rice Ortholog of the Maize INDETERMINATE1 Gene, Promotes Flowering by Up-Regulating Ehd1. *Plant Physiol.* **148**:1425–1435.
- Matsubara, K., Yamanouchi, U., Nonoue, Y., Sugimoto, K., Wang, Z. X., Minobe, Y., and Yano, M. (2011). Ehd3, encoding a plant homeodomain finger-containing protein, is a critical promoter of rice flowering. *Plant J.* **66**:603–612.
- Nakagawa, M., Shimamoto, K., and Kyojuka, J. (2002). Overexpression of RCN1 and RCN2, rice Terminal Flower 1/Centroradialis homologs, confers delay of phase transition and altered panicle morphology in rice. *Plant J.* **29**:743–750.
- Park, S. J., Kim, S. L., Lee, S., Je, B. Il, Piao, H. L., Park, S. H., Kim, C. M., Ryu, C.-H., Park, S. H., Xuan, Y., et al. (2008). Rice Indeterminate 1 (OsId1) is necessary for the expression of Ehd1 (Early heading date 1) regardless of photoperiod. *Plant J.* **56**:1018–1029.
- Peng, L. T., Shi, Z. Y., Li, L., Shen, G. Z., and Zhang, J. L. (2007). Ectopic expression of OsLFL1 in rice represses Ehd1 by binding on its promoter. *Biochem. Biophys. Res. Commun.* **360**:251–256.
- Peng, L. T., Shi, Z. Y., Li, L., Shen, G. Z., and Zhang, J. L. (2008). Overexpression of transcription factor OsLFL1 delays flowering time in *Oryza sativa*. *J. Plant Physiol.* **165**:876–885.
- Rao, N. N., Prasad, K., Kumar, P. R., and Vijayraghavan, U. (2008). Distinct regulatory role for RFL, the rice LFY homolog, in determining flowering time and plant architecture. *Proc. Natl. Acad. Sci.* **105**:3646–3651.
- Ryu, C. H., Lee, S., Cho, L. H., Kim, S. L., Lee, Y. S., Choi, S. C., Jeong, H. J., Yi, J., Park, S. J., Han, C. D., et al. (2009). OsMADS50 and OsMADS56 function antagonistically in regulating long day (LD)-dependent flowering in rice. *Plant, Cell Environ.* **32**:1412–1427.

- Saito, H., Ogiso-Tanaka, E., Okumoto, Y., Yoshitake, Y., Izumi, H., Yokoo, T., Matsubara, K., Hori, K., Yano, M., Inoue, H., et al. (2012). Ef7 Encodes an ELF3-like Protein and Promotes Rice Flowering by Negatively Regulating the Floral Repressor Gene Ghd7 under Both Short- and Long-Day Conditions. *Plant Cell Physiol.* **53**:717–728.
- Sheng, P., Wu, F., Tan, J., Zhang, H., Ma, W., Chen, L., Wang, J., Wang, J., Zhu, S., Guo, X., et al. (2016). A CONSTANS-like transcriptional activator, OsCOL13, functions as a negative regulator of flowering downstream of OsphyB and upstream of Ehd1 in rice. *Plant Mol. Biol.* **92**:209–222.
- Song, S., Wang, G., Hu, Y., Liu, H., Bai, X., Qin, R., and Xing, Y. (2018). OsMFT1 increases spikelets per panicle and delays heading date in rice by suppressing Ehd1, FZP and SEPALLATA-like genes. *J. Exp. Bot.* **69**:4283–4293.
- Sui, P., Jin, J., Ye, S., Mu, C., Gao, J., Feng, H., Shen, W. H., Yu, Y., and Dong, A. (2012). H3K36 methylation is critical for brassinosteroid-regulated plant growth and development in rice. *Plant J.* **70**:340–347.
- Sui, P., Shi, J., Gao, X., Shen, W.-H., and Dong, A. (2013). H3K36 Methylation Is Involved in Promoting Rice Flowering. *Mol. Plant* **6**.
- Sun, C., Fang, J., Zhao, T., Xu, B., Zhang, F., Liu, L., Tang, J., Zhang, G., Deng, X., Chen, F., et al. (2012). The Histone Methyltransferase SDG724 Mediates H3K36me<sub>2/3</sub> Deposition at MADS50 and RFT1 and Promotes Flowering in Rice. *Plant Cell* **24**:3235–3247.
- Tan, J., Jin, M., Wang, J., Wu, F., Sheng, P., Cheng, Z., Wang, J., Zheng, X., Chen, L., Wang, M., et al. (2016). OsCOL10, a CONSTANS-like gene, functions as a flowering time repressor downstream of Ghd7 in rice. *Plant Cell Physiol.* **57**:798–812.
- Tan, J., Wu, F., and Wan, J. (2017). Flowering time regulation by the CONSTANS-Like gene OsCOL10. *Plant Signal. Behav.* **12**:e1267893.
- Vega-Sánchez, M. E., Zeng, L., Chen, S., Leung, H., and Wang, G.-L. (2008). SPIN1, a K Homology Domain Protein Negatively Regulated and Ubiquitinated by the E3 Ubiquitin Ligase SPL11, Is Involved in Flowering Time Control in Rice. *Plant Cell* **20**:1456–1469.
- Wang, J., Hu, J., Qian, Q., and Xue, H. W. (2013). LC2 and OsVIL2 Promote Rice Flowering by Photoperoid-Induced Epigenetic Silencing of OsLF. *Mol. Plant* **6**:514–527.
- Wu, W., Zheng, X. M., Chen, D., Zhang, Y., Ma, W., Zhang, H., Sun, L., Yang, Z., Zhao, C., Zhan, X., et al. (2017). OsCOL16, encoding a CONSTANS-like protein, represses flowering by up-regulating Ghd7 expression in rice. *Plant Sci.* **260**:60–69.
- Wu, W., Zhang, Y., Zhang, M., Zhan, X., Shen, X., Yu, P., Chen, D., Liu, Q., Sinumporn, S., Hussain, K., et al. (2018). The rice CONSTANS-like protein OsCOL15 suppresses flowering by promoting Ghd7 and repressing RID1. *Biochem. Biophys. Res. Commun.* **495**:1349–1355.
- Xie, S., Chen, M., Pei, R., Ouyang, Y., and Yao, J. (2015). OsEMF2b acts as a regulator of flowering transition and floral organ identity by mediating H3K27me<sub>3</sub> deposition at OsLFL1 and OsMADS4 in rice. *Plant Mol. Biol. Report.* **33**:121–132.
- Yang, Y., Peng, Q., Chen, G. X., Li, X. H., and Wu, C. Y. (2013a). OsELF3 Is Involved in Circadian Clock Regulation for Promoting Flowering under Long-Day Conditions in Rice. *Mol. Plant* **6**:202–215.
- Yang, J., Lee, S., Hang, R., Kim, S.-R., Lee, Y.-S., Cao, X., Amasino, R., and An, G. (2013b). OsVIL2 functions with PRC2 to induce flowering by repressing OsLFL1 in rice. *Plant J.* **73**:566–578.
- Yokoo, T., Saito, H., Yoshitake, Y., Xu, Q., Asami, T., Tsukiyama, T., Teraishi, M., Okumoto, Y., and Tanisaka, T. (2014). Se14, Encoding a JmjC Domain-Containing Protein, Plays Key Roles in Long-Day Suppression of Rice Flowering through the Demethylation of H3K4me<sub>3</sub> of RFT1. *PLoS One* **9**:e96064.

**Zhao, J., Huang, X., Ouyang, X., Chen, W., Du, A., Zhu, L., Wang, S., Deng, X. W., and Li, S. (2012). OsELF3-1, an Ortholog of Arabidopsis EARLY FLOWERING 3, Regulates Rice Circadian Rhythm and Photoperiodic Flowering. *PLoS One* 7:e43705.**
